# Supplementary material for: The role of short-term memory and visuo-spatial skills in numerical magnitude processing: Evidence from Turner syndrome
Source: PLoS One. 2017 Feb 21;12(2):e0171454. doi: 10.1371/journal.pone.0171454 (PMC5319680; doi:10.1371/journal.pone.0171454)
Supplement: S2 Data — (XLSX) [file pone.0171454.s002.xlsx]

## Sheet: Weber fraction
N°	Code	Group	Length	Duration	Collection	Dot sequence	Sound sequence
1	T1	Turner	0.18472	0.140001	0.179515	0.445499	0.254705
2	T2	Turner	0.159871	0.119836	0.258629	0.148803	0.243963
3	T3	Turner	0.05	0.0773084	0.143003	0.194316	0.245731
4	T4	Turner	0.0971316	0.195242	0.320639	0.248687	0.43068
5	T5	Turner	0.193991	0.461584	0.312836	0.590992	1.17708
6	T6	Turner	0.0917344	0.155982	0.460287	0.437742	0.185064
7	T7	Turner	0.142512	0.208276	0.318916	0.323517	0.269881
8	T8	Turner	0.125886	0.233214	0.322137	0.285852	0.877891
9	T9	Turner	0.122696	0.222754	0.206001	0.259151	0.903407
10	T10	Turner	0.0956427	0.174984	0.169328	0.178008	0.234645
11	T11	Turner	0.14635	0.150666	0.179403	0.309248	0.556719
12	T12	Turner	0.156098	0.181873	0.190009	0.496343	0.366364
25	T25	Turner	0.121045	0.146167	0.15588	0.693857	0.503524
26	T26	Turner	0.140612	0.188713	0.160811	0.195605	0.538742
27	T27	Turner	0.205667	0.177927	0.244515	0.230898	0.602145
28	T28	Turner	0.140159	0.298042	0.650847	0.175196	0.985618
29	T29	Turner	0.135024	0.153873	0.46341	0.236564	0.255042
30	T30	Turner	0.413267	0.445287	0.681163	0.926168	0.903625
31	T31	Turner	0.15803	0.218808	0.318916	0.594727	0.378234
32	T32	Turner	0.118961	0.223017	0.190009	0.233745	0.281526
13	C13	Control	0.11109	0.127635	0.146092	0.193598	0.244216
14	C14	Control	0.0677722	0.181139	0.138341	0.130379	0.110926
15	C15	Control	0.0647818	0.157984	0.21502	0.319105	0.48414
16	C16	Control	0.0932985	0.19765	0.180242	0.0767918	0.109635
17	C17	Control	0.121346	0.259578	0.123893	0.185261	0.256913
18	C18	Control	0.0749588	0.330006	0.170644	0.223176	0.340677
19	C19	Control	0.0562482	0.177664	0.127215	0.201109	0.112069
20	C20	Control	0.0917344	0.106884	0.188393	0.23572	0.741942
21	C21	Control	0.0767553	0.206977	0.198827	0.373628	0.317894
22	C22	Control	0.230911	0.155951	0.172802	0.231685	0.215125
23	C23	Control	0.0535311	0.111103	0.232151	0.185759	0.146138
24	C24	Control	0.155438	0.140172	0.488204	0.350445	0.269881
33	C33	Control	0.0864522	0.240653	0.211084	0.204207	0.337175
34	C34	Control	0.0659939	0.188863	0.146032	0.186504	0.17163
35	C35	Control	0.186046	0.215023	0.576593	0.33035	0.434636
36	C36	Control	0.124821	0.402948	0.61022	0.282447	0.278468
37	C37	Control	0.252412	0.327008	0.587919	0.480539	0.370389
38	C38	Control	0.222905	0.218712	0.431078	0.234306	0.33414
39	C39	Control	0.0786159	0.345644	0.220686	0.371611	0.379201
40	C40	Control	0.154116	0.247099	0.119499	0.329748	0.299398
